# Supplementary material
Source: MDPI journal article supplement (https://www.mdpi.com/2073-4441/11/6/1234)
Supplement: s1 [file s1]

## QUESTIONNAIRE

1. i) Have you experienced flooding in **this house you live in NOW**?

Choose **ONE** option to describe **the worse** flooding you experienced:

- a) Yes – over 1m of flood water
- b) Yes – between 50cm and 1m of flood water
- c) Yes – between 10cm and 50cm of flood water
- d) Yes – but quite low levels, less than 10 cm
- e) No – never experienced flooding in my house

- ii) Have you experienced flooding in **your street**?

Choose **ANY** options that apply for **the worse** flooding you experienced:

- a) Yes – but I could still walk on the streets
- b) Yes – it was not possible to walk on the streets
- c) Yes – it was not possible to drive a car
- d) Yes – it was not possible to drive a motorcycle
- e) Yes – there was no public transport (buses)
- f) Yes – the only way to go around was by boat
- g) No – never experienced flooding in my street

2. What do you do to prepare for flooding?

Choose **ONE** option:

- a) I prepare by \_\_\_\_\_
- b) I don't do anything

3. What do you think is the cause of flooding in your area? \_\_\_\_\_

4. Who do you think is responsible for protecting you from flood?

Choose **ANY** options that apply:

- a) the central government
- b) the provincial government
- c) the Mayor
- d) the Village Head
- e) the Public Works Service
- f) the Irrigation Service
- g) the village
- h) the citizens
- i) community groups
- j) myself
- k) other: \_\_\_\_\_
- l) I don't know

5. Could you indicate where the responsibility to deal with flooding should rest between these two ends:

|            |                                                                                    |           |
|------------|------------------------------------------------------------------------------------|-----------|
| Government |  | Myself    |
| Neighbour  |  | Myself    |
| Government |  | Community |
| Community  |  | Myself    |
